# Supplementary material for: Causal relationships between rheumatism and dyslipidemia: A two-sample Mendelian randomization study
Source: PubMed Central journal article supplement (PMC9470850; doi:10.3389/fendo.2022.961505), 2022-08-31
Supplement: DataSheet_2.pdf [file DataSheet_2.pdf]

Table S1 The information of SNPs selected for MR analysis between AS and TC

| Number | SNPs       | <i>P</i> -value | Chromosome | Beta      | SE     | Sample size | EA | OA | <i>F</i> -value |
|--------|------------|-----------------|------------|-----------|--------|-------------|----|----|-----------------|
| 1      | rs1041926  | 1.55E-10        | 6          | -0.0012   | 0.0232 | 94595       | A  | G  | 40.96173        |
| 2      | rs10484558 | 7.93E-11        | 6          | 0.0386    | 0.0184 | 94595       | C  | T  | 42.2758         |
| 3      | rs10498722 | 1.24E-08        | 6          | 0.0025    | 0.0095 | 94595       | T  | C  | 32.42481        |
| 4      | rs1053924  | 7.09E-50        | 6          | -0.0068   | 0.0039 | 94595       | C  | T  | 220.4847        |
| 5      | rs10946938 | 8.81E-09        | 6          | -0.0046   | 0.006  | 94595       | A  | C  | 33.08798        |
| 6      | rs11065898 | 4.71E-08        | 12         | 0.023     | 0.0044 | 94595       | T  | C  | 29.83296        |
| 7      | rs11190133 | 4.84E-14        | 10         | -0.0045   | 0.0056 | 94595       | T  | C  | 56.7921         |
| 8      | rs11209026 | 1.94E-27        | 1          | 0.0113    | 0.0076 | 94595       | A  | G  | 117.7744        |
| 9      | rs1128905  | 6.95E-09        | 9          | -0.0012   | 0.0041 | 94595       | C  | T  | 33.54906        |
| 10     | rs11624293 | 1.49E-10        | 14         | -0.0073   | 0.0092 | 94595       | C  | T  | 41.03961        |
| 11     | rs12190030 | 1.22E-21        | 6          | 0.0184    | 0.0064 | 94595       | T  | C  | 91.32994        |
| 12     | rs1233388  | 1.49E-08        | 6          | 0.0066    | 0.0063 | 94595       | G  | A  | 32.07078        |
| 13     | rs1245371  | 5.06E-55        | 6          | 0.001     | 0.0051 | 94595       | G  | A  | 244.0845        |
| 14     | rs1250550  | 1.46E-09        | 10         | 0.0022    | 0.0055 | 94595       | A  | C  | 36.58245        |
| 15     | rs12615545 | 1.03E-09        | 2          | -0.006    | 0.0051 | 94595       | C  | T  | 37.266          |
| 16     | rs151835   | 9.69E-15        | 5          | -0.0042   | 0.0057 | 94595       | G  | A  | 59.95739        |
| 17     | rs17312661 | 1.56E-73        | 6          | -0.0112   | 0.0049 | 94595       | G  | A  | 329.0356        |
| 18     | rs1801274  | 1.35E-09        | 1          | -0.0219   | 0.0052 | 94595       | G  | A  | 36.74092        |
| 19     | rs1860545  | 2.78E-10        | 12         | 1.00E-04  | 0.0057 | 94595       | A  | G  | 39.82088        |
| 20     | rs2021729  | 4.45E-26        | 6          | 0.0073    | 0.0057 | 94595       | A  | G  | 111.5632        |
| 21     | rs2074475  | 1.09E-56        | 6          | 0.0082    | 0.0117 | 94595       | C  | T  | 251.7352        |
| 22     | rs2074489  | 1.01E-103       | 6          | 0.0179    | 0.0058 | 94595       | T  | C  | 467.7104        |
| 23     | rs2076530  | 1.53E-75        | 6          | 0.0216    | 0.0051 | 94595       | C  | T  | 338.2522        |
| 24     | rs2093169  | 8.32E-14        | 6          | -0.0064   | 0.0048 | 94595       | T  | C  | 55.72894        |
| 25     | rs2235233  | 9.39E-21        | 6          | -0.0059   | 0.0045 | 94595       | C  | T  | 87.28543        |
| 26     | rs2239842  | 1.36E-14        | 6          | 0.0121    | 0.0053 | 94595       | G  | A  | 59.29114        |
| 27     | rs2257914  | 4.32E-79        | 6          | 0.0225    | 0.0059 | 94595       | A  | C  | 354.5499        |
| 28     | rs2261033  | 1.00E-200       | 6          | 0.0187    | 0.0036 | 94595       | G  | A  | 1309.706        |
| 29     | rs2523454  | 1.54E-134       | 6          | -0.0284   | 0.0039 | 94595       | A  | G  | 609.3619        |
| 31     | rs2549803  | 2.79E-27        | 5          | -0.0047   | 0.0052 | 94595       | T  | C  | 117.0588        |
| 32     | rs2596501  | 1.00E-200       | 6          | 0.0233    | 0.0036 | 94595       | T  | C  | 1319.308        |
| 33     | rs2621330  | 2.95E-08        | 6          | -0.0139   | 0.013  | 94595       | T  | C  | 30.74041        |
| 34     | rs27529    | 3.28E-47        | 5          | 0.0016    | 0.0053 | 94595       | G  | A  | 208.2702        |
| 35     | rs2927613  | 7.07E-10        | 5          | -0.0021   | 0.0057 | 94595       | A  | G  | 38.00118        |
| 36     | rs3094225  | 1.12E-81        | 6          | 0.0178    | 0.006  | 94595       | A  | G  | 366.4394        |
| 37     | rs3130783  | 5.45E-47        | 6          | 0.0074    | 0.0065 | 94595       | A  | G  | 207.2555        |
| 38     | rs387608   | 1.59E-51        | 6          | -0.0029   | 0.0056 | 94595       | A  | G  | 228.0515        |
| 39     | rs408359   | 7.71E-22        | 6          | 0.0062    | 0.0071 | 94595       | A  | G  | 92.23078        |
| 40     | rs4129267  | 3.32E-13        | 1          | 0.0052    | 0.0036 | 94595       | T  | C  | 53.00824        |
| 41     | rs4248166  | 1.00E-200       | 6          | 0.033     | 0.0046 | 94595       | C  | T  | 956.0403        |
| 42     | rs4672505  | 5.14E-47        | 2          | -0.0023   | 0.0053 | 94595       | G  | A  | 207.3744        |
| 43     | rs4676410  | 9.90E-09        | 2          | -0.0241   | 0.0077 | 94595       | A  | G  | 32.86115        |
| 44     | rs6556416  | 4.22E-08        | 5          | 0.006     | 0.0056 | 94595       | C  | A  | 30.04494        |
| 45     | rs683208   | 7.58E-47        | 6          | 0.0113    | 0.0054 | 94595       | C  | T  | 206.6011        |
| 46     | rs6906654  | 4.82E-08        | 6          | 0.0023    | 0.0059 | 94595       | A  | G  | 29.78965        |
| 47     | rs6921589  | 2.42E-08        | 6          | -0.0055   | 0.0054 | 94595       | C  | A  | 31.12054        |
| 48     | rs707936   | 2.47E-24        | 6          | 0.0134    | 0.0107 | 94595       | A  | G  | 103.6029        |
| 49     | rs7282490  | 6.21E-09        | 21         | -0.0029   | 0.0036 | 94595       | A  | G  | 33.76682        |
| 50     | rs7453920  | 1.18E-42        | 6          | 0.0146    | 0.0037 | 94595       | G  | A  | 187.384         |
| 51     | rs7760906  | 1.66E-08        | 6          | 0.0026    | 0.0069 | 94595       | A  | C  | 31.86106        |
| 52     | rs8512     | 6.55E-32        | 6          | 0.0165    | 0.005  | 94595       | A  | G  | 138.2128        |
| 53     | rs9263739  | 7.25E-85        | 6          | -0.009    | 0.005  | 94595       | T  | C  | 381.0747        |
| 54     | rs9277965  | 3.39E-10        | 6          | -0.0018   | 0.0053 | 94595       | A  | G  | 39.4373         |
| 55     | rs9368781  | 9.02E-11        | 6          | -0.0108   | 0.0087 | 94595       | G  | A  | 42.02379        |
| 56     | rs9378123  | 9.75E-37        | 6          | 0.0191    | 0.0055 | 94595       | G  | A  | 160.2948        |
| 57     | rs9379831  | 3.40E-20        | 6          | -3.00E-04 | 0.0038 | 94595       | A  | C  | 84.74387        |
| 58     | rs9380120  | 5.00E-46        | 6          | 0.005     | 0.0058 | 94595       | C  | T  | 202.8458        |
| 59     | rs9393646  | 1.10E-16        | 6          | 0.0075    | 0.0051 | 94595       | A  | G  | 68.78744        |
| 60     | rs9468508  | 1.88E-18        | 6          | -0.0015   | 0.0086 | 94595       | T  | C  | 76.80947        |
| 61     | rs9468942  | 1.08E-11        | 6          | -0.006    | 0.0175 | 94595       | A  | G  | 46.17482        |
| 62     | rs9901869  | 6.04E-15        | 17         | 0.0234    | 0.0051 | 94595       | A  | G  | 60.88986        |
| 63     | rs998509   | 4.30E-11        | 5          | 0.0072    | 0.008  | 94595       | A  | G  | 43.47316        |

Table S2 The information of SNPs selected for MR analysis between AS and LDL

| Number | SNPs       | <i>P</i> -value | Chromosome | Beta      | SE     | Sample size | EA | OA | <i>F</i> -value |
|--------|------------|-----------------|------------|-----------|--------|-------------|----|----|-----------------|
| 1      | rs1041926  | 1.55E-10        | 6          | 0.0108    | 0.0244 | 94595       | A  | G  | 40.96173        |
| 2      | rs10484558 | 7.93E-11        | 6          | 0.0268    | 0.0187 | 94595       | C  | T  | 42.2758         |
| 3      | rs10498722 | 1.24E-08        | 6          | 0.0084    | 0.0098 | 94595       | T  | C  | 32.42481        |
| 4      | rs1053924  | 7.09E-50        | 6          | -0.0094   | 0.004  | 94595       | C  | T  | 220.4847        |
| 5      | rs10946938 | 8.81E-09        | 6          | -0.0065   | 0.0062 | 94595       | A  | C  | 33.08798        |
| 6      | rs11065898 | 4.71E-08        | 12         | 0.0252    | 0.0046 | 94595       | T  | C  | 29.83296        |
| 7      | rs11190133 | 4.84E-14        | 10         | 0.0034    | 0.0058 | 94595       | T  | C  | 56.7921         |
| 8      | rs11209026 | 1.94E-27        | 1          | 0.009     | 0.0079 | 94595       | A  | G  | 117.7744        |
| 9      | rs1128905  | 6.95E-09        | 9          | -0.0075   | 0.0042 | 94595       | C  | T  | 33.54906        |
| 10     | rs11624293 | 1.49E-10        | 14         | -0.0058   | 0.0094 | 94595       | C  | T  | 41.03961        |
| 11     | rs12190030 | 1.22E-21        | 6          | 0.0111    | 0.0066 | 94595       | T  | C  | 91.32994        |
| 12     | rs1233388  | 1.49E-08        | 6          | 0.0054    | 0.0064 | 94595       | G  | A  | 32.07078        |
| 13     | rs1245371  | 5.06E-55        | 6          | 0.0102    | 0.0052 | 94595       | G  | A  | 244.0845        |
| 14     | rs1250550  | 1.46E-09        | 10         | 6.00E-04  | 0.0057 | 94595       | A  | C  | 36.58245        |
| 15     | rs12615545 | 1.03E-09        | 2          | -0.0045   | 0.0052 | 94595       | C  | T  | 37.266          |
| 16     | rs151835   | 9.69E-15        | 5          | -0.0037   | 0.0058 | 94595       | G  | A  | 59.95739        |
| 17     | rs17312661 | 1.56E-73        | 6          | -6.00E-04 | 0.005  | 94595       | G  | A  | 329.0356        |
| 18     | rs1801274  | 1.35E-09        | 1          | -0.0226   | 0.0053 | 94595       | G  | A  | 36.74092        |
| 19     | rs1860545  | 2.78E-10        | 12         | 1.00E-04  | 0.0059 | 94595       | A  | G  | 39.82088        |
| 20     | rs2021729  | 4.45E-26        | 6          | 0.0053    | 0.0058 | 94595       | A  | G  | 111.5632        |
| 21     | rs2074475  | 1.09E-56        | 6          | 0.0018    | 0.0123 | 94595       | C  | T  | 251.7352        |
| 22     | rs2074489  | 1.01E-103       | 6          | 0.0115    | 0.006  | 94595       | T  | C  | 467.7104        |
| 23     | rs2076530  | 1.53E-75        | 6          | 0.0087    | 0.0052 | 94595       | C  | T  | 338.2522        |
| 24     | rs2093169  | 8.32E-14        | 6          | 0.0031    | 0.0049 | 94595       | T  | C  | 55.72894        |
| 25     | rs2235233  | 9.39E-21        | 6          | -0.0074   | 0.0046 | 94595       | C  | T  | 87.28543        |
| 26     | rs2239842  | 1.36E-14        | 6          | 0.0118    | 0.0054 | 94595       | G  | A  | 59.29114        |
| 27     | rs2257914  | 4.32E-79        | 6          | 0.0153    | 0.006  | 94595       | A  | C  | 354.5499        |
| 28     | rs2261033  | 1.00E-200       | 6          | 0.0143    | 0.0037 | 94595       | G  | A  | 1309.706        |
| 29     | rs2523454  | 1.54E-134       | 6          | -0.02     | 0.0041 | 94595       | A  | G  | 609.3619        |
| 31     | rs2549803  | 2.79E-27        | 5          | -0.0078   | 0.0054 | 94595       | T  | C  | 117.0588        |
| 32     | rs2596501  | 1.00E-200       | 6          | 0.0159    | 0.0038 | 94595       | T  | C  | 1319.308        |
| 33     | rs2621330  | 2.95E-08        | 6          | -0.0309   | 0.0132 | 94595       | T  | C  | 30.74041        |
| 34     | rs27529    | 3.28E-47        | 5          | -0.004    | 0.0054 | 94595       | G  | A  | 208.2702        |
| 35     | rs2927613  | 7.07E-10        | 5          | -0.0038   | 0.0058 | 94595       | A  | G  | 38.00118        |
| 36     | rs3094225  | 1.12E-81        | 6          | 0.0127    | 0.0062 | 94595       | A  | G  | 366.4394        |
| 37     | rs3130783  | 5.45E-47        | 6          | 0.0048    | 0.0066 | 94595       | A  | G  | 207.2555        |
| 38     | rs387608   | 1.59E-51        | 6          | -0.0082   | 0.0057 | 94595       | A  | G  | 228.0515        |
| 39     | rs408359   | 7.71E-22        | 6          | -0.0019   | 0.0073 | 94595       | A  | G  | 92.23078        |
| 40     | rs4129267  | 3.32E-13        | 1          | 0.0033    | 0.0037 | 94595       | T  | C  | 53.00824        |
| 41     | rs4248166  | 1.00E-200       | 6          | 0.0296    | 0.0047 | 94595       | C  | T  | 956.0403        |
| 42     | rs4672505  | 5.14E-47        | 2          | -0.0013   | 0.0054 | 94595       | G  | A  | 207.3744        |
| 43     | rs4676410  | 9.90E-09        | 2          | -0.0219   | 0.0078 | 94595       | A  | G  | 32.86115        |
| 44     | rs6556416  | 4.22E-08        | 5          | 0.0103    | 0.0058 | 94595       | C  | A  | 30.04494        |
| 45     | rs683208   | 7.58E-47        | 6          | 0.0059    | 0.0055 | 94595       | C  | T  | 206.6011        |
| 46     | rs6906654  | 4.82E-08        | 6          | -0.0011   | 0.0061 | 94595       | A  | G  | 29.78965        |
| 47     | rs6921589  | 2.42E-08        | 6          | -0.0149   | 0.0056 | 94595       | C  | A  | 31.12054        |
| 48     | rs707936   | 2.47E-24        | 6          | 0.0048    | 0.011  | 94595       | A  | G  | 103.6029        |
| 49     | rs7282490  | 6.21E-09        | 21         | -0.0047   | 0.0037 | 94595       | A  | G  | 33.76682        |
| 50     | rs7453920  | 1.18E-42        | 6          | 0.0101    | 0.0038 | 94595       | G  | A  | 187.384         |
| 51     | rs7760906  | 1.66E-08        | 6          | 0.0045    | 0.0071 | 94595       | A  | C  | 31.86106        |
| 52     | rs8512     | 6.55E-32        | 6          | 0.0133    | 0.0052 | 94595       | A  | G  | 138.2128        |
| 53     | rs9263739  | 7.25E-85        | 6          | -0.0125   | 0.0052 | 94595       | T  | C  | 381.0747        |
| 54     | rs9277965  | 3.39E-10        | 6          | -7.00E-04 | 0.0055 | 94595       | A  | G  | 39.4373         |
| 55     | rs9368781  | 9.02E-11        | 6          | -0.013    | 0.0089 | 94595       | G  | A  | 42.02379        |
| 56     | rs9378123  | 9.75E-37        | 6          | 0.0102    | 0.0057 | 94595       | G  | A  | 160.2948        |
| 57     | rs9379831  | 3.40E-20        | 6          | -0.0028   | 0.0039 | 94595       | A  | C  | 84.74387        |
| 58     | rs9380120  | 5.00E-46        | 6          | 1.00E-04  | 0.006  | 94595       | C  | T  | 202.8458        |
| 59     | rs9393646  | 1.10E-16        | 6          | 0.0064    | 0.0052 | 94595       | A  | G  | 68.78744        |
| 60     | rs9468508  | 1.88E-18        | 6          | 0.0053    | 0.0089 | 94595       | T  | C  | 76.80947        |
| 61     | rs9468942  | 1.08E-11        | 6          | -0.0034   | 0.0181 | 94595       | A  | G  | 46.17482        |
| 62     | rs9901869  | 6.04E-15        | 17         | 0.0252    | 0.0052 | 94595       | A  | G  | 60.88986        |
| 63     | rs998509   | 4.30E-11        | 5          | 0.0019    | 0.0082 | 94595       | A  | G  | 43.47316        |

Table S3 The information of SNPs selected for MR analysis between AS and HDL

| Number | SNPs       | <i>P</i> -value | Chromosome | Beta      | SE     | Sample size | EA | OA | <i>F</i> -value |
|--------|------------|-----------------|------------|-----------|--------|-------------|----|----|-----------------|
| 1      | rs1041926  | 1.55E-10        | 6          | 0.022     | 0.0208 | 94595       | A  | G  | 40.96173        |
| 2      | rs10484558 | 7.93E-11        | 6          | -0.0097   | 0.0173 | 94595       | C  | T  | 42.2758         |
| 3      | rs10498722 | 1.24E-08        | 6          | -0.0089   | 0.0089 | 94595       | T  | C  | 32.42481        |
| 4      | rs1053924  | 7.09E-50        | 6          | -0.0057   | 0.0038 | 94595       | C  | T  | 220.4847        |
| 5      | rs10946938 | 8.81E-09        | 6          | -0.0084   | 0.0057 | 94595       | A  | C  | 33.08798        |
| 6      | rs11065898 | 4.71E-08        | 12         | 0.0042    | 0.0043 | 94595       | T  | C  | 29.83296        |
| 7      | rs11190133 | 4.84E-14        | 10         | -0.0064   | 0.0053 | 94595       | T  | C  | 56.7921         |
| 8      | rs11209026 | 1.94E-27        | 1          | 0.0074    | 0.0073 | 94595       | A  | G  | 117.7744        |
| 9      | rs1128905  | 6.95E-09        | 9          | -0.0034   | 0.004  | 94595       | C  | T  | 33.54906        |
| 10     | rs11624293 | 1.49E-10        | 14         | -0.0117   | 0.0087 | 94595       | C  | T  | 41.03961        |
| 11     | rs12190030 | 1.22E-21        | 6          | 0.0095    | 0.0061 | 94595       | T  | C  | 91.32994        |
| 12     | rs1233388  | 1.49E-08        | 6          | 0.0067    | 0.0059 | 94595       | G  | A  | 32.07078        |
| 13     | rs1245371  | 5.06E-55        | 6          | -0.0151   | 0.005  | 94595       | G  | A  | 244.0845        |
| 14     | rs1250550  | 1.46E-09        | 10         | -0.0054   | 0.0053 | 94595       | A  | C  | 36.58245        |
| 15     | rs12615545 | 1.03E-09        | 2          | -0.0037   | 0.0048 | 94595       | C  | T  | 37.266          |
| 16     | rs151835   | 9.69E-15        | 5          | -0.0033   | 0.0053 | 94595       | G  | A  | 59.95739        |
| 17     | rs17312661 | 1.56E-73        | 6          | -0.0138   | 0.0047 | 94595       | G  | A  | 329.0356        |
| 18     | rs1801274  | 1.35E-09        | 1          | -0.0058   | 0.0049 | 94595       | G  | A  | 36.74092        |
| 19     | rs1860545  | 2.78E-10        | 12         | -0.0059   | 0.0055 | 94595       | A  | G  | 39.82088        |
| 20     | rs2021729  | 4.45E-26        | 6          | -0.0027   | 0.0053 | 94595       | A  | G  | 111.5632        |
| 21     | rs2074475  | 1.09E-56        | 6          | 0.028     | 0.0112 | 94595       | C  | T  | 251.7352        |
| 22     | rs2074489  | 1.01E-103       | 6          | -0.0034   | 0.0055 | 94595       | T  | C  | 467.7104        |
| 23     | rs2076530  | 1.53E-75        | 6          | 0.0108    | 0.0048 | 94595       | C  | T  | 338.2522        |
| 24     | rs2093169  | 8.32E-14        | 6          | -0.0117   | 0.0046 | 94595       | T  | C  | 55.72894        |
| 25     | rs2235233  | 9.39E-21        | 6          | -9.00E-04 | 0.0043 | 94595       | C  | T  | 87.28543        |
| 26     | rs2239842  | 1.36E-14        | 6          | -0.0064   | 0.005  | 94595       | G  | A  | 59.29114        |
| 27     | rs2257914  | 4.32E-79        | 6          | 0.0028    | 0.0056 | 94595       | A  | C  | 354.5499        |
| 28     | rs2261033  | 1.00E-200       | 6          | 0.0065    | 0.0034 | 94595       | G  | A  | 1309.706        |
| 29     | rs2523454  | 1.54E-134       | 6          | -0.0128   | 0.0038 | 94595       | A  | G  | 609.3619        |
| 31     | rs2549803  | 2.79E-27        | 5          | 0.0044    | 0.0049 | 94595       | T  | C  | 117.0588        |
| 32     | rs2596501  | 1.00E-200       | 6          | 0.0135    | 0.0035 | 94595       | T  | C  | 1319.308        |
| 33     | rs2621330  | 2.95E-08        | 6          | 0.018     | 0.0122 | 94595       | T  | C  | 30.74041        |
| 34     | rs27529    | 3.28E-47        | 5          | 0.0119    | 0.0049 | 94595       | G  | A  | 208.2702        |
| 35     | rs2927613  | 7.07E-10        | 5          | 0.0045    | 0.0053 | 94595       | A  | G  | 38.00118        |
| 36     | rs3094225  | 1.12E-81        | 6          | -0.0011   | 0.0056 | 94595       | A  | G  | 366.4394        |
| 37     | rs387608   | 1.59E-51        | 6          | -0.0022   | 0.0054 | 94595       | A  | G  | 228.0515        |
| 38     | rs408359   | 7.71E-22        | 6          | 0.0104    | 0.0069 | 94595       | A  | G  | 92.23078        |
| 39     | rs4129267  | 3.32E-13        | 1          | 0.0032    | 0.0035 | 94595       | T  | C  | 53.00824        |
| 40     | rs4248166  | 1.00E-200       | 6          | 0.0059    | 0.0044 | 94595       | C  | T  | 956.0403        |
| 41     | rs4672505  | 5.14E-47        | 2          | -0.0026   | 0.0049 | 94595       | G  | A  | 207.3744        |
| 42     | rs4676410  | 9.90E-09        | 2          | 0.0043    | 0.0072 | 94595       | A  | G  | 32.86115        |
| 43     | rs6556416  | 4.22E-08        | 5          | -0.0064   | 0.0053 | 94595       | C  | A  | 30.04494        |
| 44     | rs683208   | 7.58E-47        | 6          | 0.0047    | 0.0052 | 94595       | C  | T  | 206.6011        |
| 45     | rs6906654  | 4.82E-08        | 6          | -2.00E-04 | 0.0057 | 94595       | A  | G  | 29.78965        |
| 46     | rs6921589  | 2.42E-08        | 6          | 0.0106    | 0.0052 | 94595       | C  | A  | 31.12054        |
| 47     | rs707936   | 2.47E-24        | 6          | -0.0295   | 0.0101 | 94595       | A  | G  | 103.6029        |
| 48     | rs7282490  | 6.21E-09        | 21         | 5.00E-04  | 0.0035 | 94595       | A  | G  | 33.76682        |
| 49     | rs7453920  | 1.18E-42        | 6          | 0.0122    | 0.0036 | 94595       | G  | A  | 187.384         |
| 50     | rs7760906  | 1.66E-08        | 6          | -0.0045   | 0.0066 | 94595       | A  | C  | 31.86106        |
| 51     | rs8512     | 6.55E-32        | 6          | 0.0059    | 0.0048 | 94595       | A  | G  | 138.2128        |
| 52     | rs9263739  | 7.25E-85        | 6          | 0.0141    | 0.0048 | 94595       | T  | C  | 381.0747        |
| 53     | rs9277965  | 3.39E-10        | 6          | -0.0033   | 0.0051 | 94595       | A  | G  | 39.4373         |
| 54     | rs9368781  | 9.02E-11        | 6          | -0.0046   | 0.0081 | 94595       | G  | A  | 42.02379        |
| 55     | rs9378123  | 9.75E-37        | 6          | 0.0031    | 0.0053 | 94595       | G  | A  | 160.2948        |
| 56     | rs9379831  | 3.40E-20        | 6          | 0.0098    | 0.0037 | 94595       | A  | C  | 84.74387        |
| 57     | rs9380120  | 5.00E-46        | 6          | 0.0136    | 0.0056 | 94595       | C  | T  | 202.8458        |
| 58     | rs9393646  | 1.10E-16        | 6          | 0.0053    | 0.0049 | 94595       | A  | G  | 68.78744        |
| 59     | rs9468508  | 1.88E-18        | 6          | -0.0063   | 0.0083 | 94595       | T  | C  | 76.80947        |
| 60     | rs9468942  | 1.08E-11        | 6          | -0.0243   | 0.0171 | 94595       | A  | G  | 46.17482        |
| 61     | rs9901869  | 6.04E-15        | 17         | 0.0146    | 0.0048 | 94595       | A  | G  | 60.88986        |
| 62     | rs998509   | 4.30E-11        | 5          | 0.0076    | 0.0075 | 94595       | A  | G  | 43.47316        |







Table S7 The information of SNPs selected for MR analysis between SLE and TC

| Number | SNPs       | <i>P</i> -value | Chromosome | Beta      | SE     | Sample size | EA | OA | <i>F</i> -value |
|--------|------------|-----------------|------------|-----------|--------|-------------|----|----|-----------------|
| 1      | rs10200680 | 4.96E-09        | 2          | -0.0016   | 0.0098 | 94595       | T  | C  | 34.20392        |
| 2      | rs1078324  | 7.11E-20        | 5          | 0.021     | 0.0177 | 94595       | A  | C  | 83.28446        |
| 3      | rs12662632 | 5.53E-11        | 6          | -0.0073   | 0.0144 | 94595       | C  | G  | 42.98038        |
| 4      | rs13019891 | 1.65E-83        | 2          | -0.0053   | 0.0053 | 94595       | T  | G  | 374.8476        |
| 5      | rs1464446  | 2.79E-16        | 3          | -0.0057   | 0.0073 | 94595       | T  | G  | 66.94478        |
| 6      | rs154977   | 5.65E-15        | 6          | 0.0106    | 0.0047 | 94595       | G  | C  | 61.01911        |
| 7      | rs17615220 | 2.86E-12        | 6          | -0.0078   | 0.0071 | 94595       | G  | A  | 48.78294        |
| 8      | rs185819   | 2.32E-37        | 6          | 0.0059    | 0.0036 | 94595       | C  | T  | 163.1505        |
| 9      | rs1894406  | 2.22E-20        | 6          | 0.0183    | 0.0038 | 94595       | T  | C  | 85.58207        |
| 10     | rs194675   | 2.71E-12        | 6          | 0.0116    | 0.0054 | 94595       | A  | T  | 48.8908         |
| 11     | rs2022082  | 2.78E-12        | 6          | 0.0061    | 0.0057 | 94595       | C  | T  | 48.83822        |
| 12     | rs2076530  | 2.13E-23        | 6          | 0.0216    | 0.0051 | 94595       | C  | T  | 99.33799        |
| 13     | rs2293765  | 3.61E-19        | 2          | 0.014     | 0.0052 | 94595       | A  | C  | 80.07252        |
| 14     | rs2293861  | 9.84E-21        | 6          | 0.0215    | 0.0068 | 94595       | T  | C  | 87.19266        |
| 15     | rs2294473  | 3.89E-08        | 6          | 0.0028    | 0.0036 | 94595       | C  | G  | 30.20593        |
| 16     | rs2395004  | 3.98E-08        | 6          | -0.0156   | 0.0051 | 94595       | C  | G  | 30.16009        |
| 17     | rs2431697  | 2.60E-14        | 5          | 0.0088    | 0.0053 | 94595       | C  | T  | 58.01522        |
| 18     | rs2442728  | 4.63E-24        | 6          | -0.0232   | 0.0054 | 94595       | T  | G  | 102.3588        |
| 19     | rs2517554  | 1.43E-10        | 6          | -0.0059   | 0.0056 | 94595       | T  | C  | 41.11707        |
| 20     | rs2573219  | 1.13E-42        | 2          | 0.0055    | 0.0087 | 94595       | C  | A  | 187.4711        |
| 21     | rs2853950  | 1.71E-13        | 6          | 0.0222    | 0.0053 | 94595       | T  | C  | 54.30977        |
| 22     | rs3095339  | 9.05E-34        | 6          | -0.0184   | 0.006  | 94595       | G  | A  | 146.7157        |
| 23     | rs3131932  | 3.03E-18        | 6          | 0.0105    | 0.0053 | 94595       | A  | G  | 75.86964        |
| 24     | rs353608   | 2.93E-11        | 11         | -0.0062   | 0.0051 | 94595       | G  | A  | 44.22171        |
| 25     | rs3819720  | 2.10E-15        | 6          | -0.0089   | 0.0057 | 94595       | A  | G  | 62.96659        |
| 26     | rs389884   | 2.92E-102       | 6          | -0.0481   | 0.0084 | 94595       | G  | A  | 460.9908        |
| 27     | rs4585609  | 1.57E-10        | 6          | 0.0105    | 0.0043 | 94595       | C  | T  | 40.93853        |
| 28     | rs4661543  | 9.40E-11        | 1          | -0.0058   | 0.0087 | 94595       | G  | T  | 41.94263        |
| 29     | rs4728142  | 5.37E-28        | 7          | -0.0082   | 0.0056 | 94595       | A  | G  | 120.3265        |
| 30     | rs4916215  | 5.07E-11        | 1          | 0.0058    | 0.0058 | 94595       | T  | C  | 43.15163        |
| 31     | rs512681   | 8.75E-13        | 2          | 0.0089    | 0.0073 | 94595       | A  | C  | 51.10645        |
| 32     | rs572708   | 1.49E-09        | 6          | 0.0083    | 0.0076 | 94595       | C  | T  | 36.54206        |
| 33     | rs6671847  | 6.64E-12        | 1          | -0.023    | 0.0052 | 94595       | A  | G  | 47.13087        |
| 34     | rs6679677  | 4.55E-13        | 1          | -0.0083   | 0.0057 | 94595       | A  | C  | 52.39197        |
| 35     | rs670369   | 6.83E-09        | 6          | 0.0216    | 0.0068 | 94595       | T  | C  | 33.58255        |
| 36     | rs6889239  | 2.19E-18        | 5          | -4.00E-04 | 0.0058 | 94595       | C  | T  | 76.51123        |
| 37     | rs6903160  | 9.27E-09        | 6          | -0.0051   | 0.0054 | 94595       | A  | T  | 32.9883         |
| 38     | rs7097397  | 8.60E-11        | 10         | 0.0065    | 0.0052 | 94595       | A  | G  | 42.11577        |
| 39     | rs721803   | 1.81E-09        | 6          | -0.0041   | 0.004  | 94595       | A  | G  | 36.16794        |
| 40     | rs7386188  | 1.10E-08        | 8          | -0.0161   | 0.0142 | 94595       | G  | T  | 32.6477         |
| 41     | rs7601754  | 9.31E-25        | 2          | -0.0093   | 0.0067 | 94595       | A  | G  | 105.5375        |
| 42     | rs7746553  | 1.16E-11        | 6          | 0.021     | 0.005  | 94595       | G  | C  | 46.04375        |
| 43     | rs7823055  | 1.64E-34        | 8          | 0.0031    | 0.0061 | 94595       | T  | G  | 150.1072        |
| 44     | rs885952   | 8.27E-22        | 6          | 0.0068    | 0.0052 | 94595       | T  | C  | 92.09312        |
| 45     | rs9266791  | 3.53E-26        | 6          | 0.0235    | 0.0046 | 94595       | C  | T  | 112.0218        |
| 46     | rs9461633  | 7.98E-11        | 6          | 0.0217    | 0.0062 | 94595       | G  | A  | 42.26264        |
| 47     | rs946173   | 2.69E-11        | 1          | -0.0015   | 0.0086 | 94595       | G  | A  | 44.38952        |
| 48     | rs9468344  | 4.00E-13        | 6          | -0.0153   | 0.0059 | 94595       | G  | T  | 52.64146        |
| 49     | rs9852014  | 2.26E-36        | 3          | 0.0041    | 0.0103 | 94595       | G  | A  | 158.6276        |

Table S8 The information of SNPs selected for MR analysis between SLE and LDL

| Number | SNPs       | <i>P</i> -value | Chromosome | Beta      | SE     | Sample size | EA | OA | <i>F</i> -value |
|--------|------------|-----------------|------------|-----------|--------|-------------|----|----|-----------------|
| 1      | rs10200680 | 4.96E-09        | 2          | -0.014    | 0.01   | 94595       | T  | C  | 34.2039198      |
| 2      | rs1078324  | 7.11E-20        | 5          | 0.0118    | 0.018  | 94595       | A  | C  | 83.2844647      |
| 3      | rs12662632 | 5.53E-11        | 6          | -0.0129   | 0.0149 | 94595       | C  | G  | 42.9803809      |
| 4      | rs13019891 | 1.65E-83        | 2          | -0.0061   | 0.0054 | 94595       | T  | G  | 374.847615      |
| 5      | rs1464446  | 2.79E-16        | 3          | -0.0095   | 0.0075 | 94595       | T  | G  | 66.9447794      |
| 6      | rs154977   | 5.65E-15        | 6          | 4.00E-04  | 0.0049 | 94595       | G  | C  | 61.019111       |
| 7      | rs17615220 | 2.86E-12        | 6          | 4.00E-04  | 0.0073 | 94595       | G  | A  | 48.7829382      |
| 8      | rs185819   | 2.32E-37        | 6          | 6.00E-04  | 0.0038 | 94595       | C  | T  | 163.15048       |
| 9      | rs1894406  | 2.22E-20        | 6          | 0.0172    | 0.0039 | 94595       | T  | C  | 85.5820736      |
| 10     | rs194675   | 2.71E-12        | 6          | 0.0103    | 0.0056 | 94595       | A  | T  | 48.8907984      |
| 11     | rs2022082  | 2.78E-12        | 6          | 0.0033    | 0.0058 | 94595       | C  | T  | 48.83822        |
| 12     | rs2076530  | 2.13E-23        | 6          | 0.0087    | 0.0052 | 94595       | C  | T  | 99.3379872      |
| 13     | rs2293765  | 3.61E-19        | 2          | 0.012     | 0.0053 | 94595       | A  | C  | 80.0725239      |
| 14     | rs2293861  | 9.84E-21        | 6          | 0.0179    | 0.007  | 94595       | T  | C  | 87.1926638      |
| 15     | rs2294473  | 3.89E-08        | 6          | -0.0014   | 0.0037 | 94595       | C  | G  | 30.2059267      |
| 16     | rs2395004  | 3.98E-08        | 6          | -0.0134   | 0.0053 | 94595       | C  | G  | 30.1600891      |
| 17     | rs2431697  | 2.60E-14        | 5          | 0.0103    | 0.0054 | 94595       | C  | T  | 58.0152161      |
| 18     | rs2442728  | 4.63E-24        | 6          | -0.0171   | 0.0055 | 94595       | T  | G  | 102.358781      |
| 19     | rs2517554  | 1.43E-10        | 6          | 0.0044    | 0.0057 | 94595       | T  | C  | 41.1170713      |
| 20     | rs2573219  | 1.13E-42        | 2          | 0.0023    | 0.0089 | 94595       | C  | A  | 187.471115      |
| 21     | rs2853950  | 1.71E-13        | 6          | 0.0187    | 0.0054 | 94595       | T  | C  | 54.3097698      |
| 22     | rs3095339  | 9.05E-34        | 6          | -0.0115   | 0.0061 | 94595       | G  | A  | 146.71572       |
| 23     | rs3131932  | 3.03E-18        | 6          | 0.01      | 0.0054 | 94595       | A  | G  | 75.8696437      |
| 24     | rs353608   | 2.93E-11        | 11         | -0.0051   | 0.0052 | 94595       | G  | A  | 44.2217073      |
| 25     | rs3819720  | 2.10E-15        | 6          | -0.0036   | 0.0058 | 94595       | A  | G  | 62.9665878      |
| 26     | rs389884   | 2.92E-102       | 6          | -0.0235   | 0.0086 | 94595       | G  | A  | 460.990804      |
| 27     | rs4585609  | 1.57E-10        | 6          | 0.0055    | 0.0044 | 94595       | C  | T  | 40.9385265      |
| 28     | rs4661543  | 9.40E-11        | 1          | -0.0015   | 0.0089 | 94595       | G  | T  | 41.9426296      |
| 29     | rs4728142  | 5.37E-28        | 7          | -0.0061   | 0.0057 | 94595       | A  | G  | 120.326529      |
| 30     | rs4916215  | 5.07E-11        | 1          | 0.0076    | 0.0059 | 94595       | T  | C  | 43.1516327      |
| 31     | rs512681   | 8.75E-13        | 2          | 0.0127    | 0.0075 | 94595       | A  | C  | 51.1064491      |
| 32     | rs572708   | 1.49E-09        | 6          | -0.0019   | 0.0078 | 94595       | C  | T  | 36.5420581      |
| 33     | rs6671847  | 6.64E-12        | 1          | -0.0245   | 0.0054 | 94595       | A  | G  | 47.1308741      |
| 34     | rs6679677  | 4.55E-13        | 1          | -0.0051   | 0.006  | 94595       | A  | C  | 52.3919683      |
| 35     | rs670369   | 6.83E-09        | 6          | 0.0232    | 0.0069 | 94595       | T  | C  | 33.5825457      |
| 36     | rs6889239  | 2.19E-18        | 5          | -0.002    | 0.0059 | 94595       | C  | T  | 76.5112326      |
| 37     | rs6903160  | 9.27E-09        | 6          | 0.0021    | 0.0055 | 94595       | A  | T  | 32.9882999      |
| 38     | rs7097397  | 8.60E-11        | 10         | 0.0075    | 0.0053 | 94595       | A  | G  | 42.1157683      |
| 39     | rs721803   | 1.81E-09        | 6          | -0.0064   | 0.0042 | 94595       | A  | G  | 36.1679387      |
| 40     | rs7386188  | 1.10E-08        | 8          | -0.0155   | 0.0145 | 94595       | G  | T  | 32.6477016      |
| 41     | rs7601754  | 9.31E-25        | 2          | -0.0048   | 0.0068 | 94595       | A  | G  | 105.537463      |
| 42     | rs7746553  | 1.16E-11        | 6          | 0.0149    | 0.0052 | 94595       | G  | C  | 46.0437492      |
| 43     | rs7823055  | 1.64E-34        | 8          | 0.003     | 0.0062 | 94595       | T  | G  | 150.107188      |
| 44     | rs885952   | 8.27E-22        | 6          | 0.006     | 0.0053 | 94595       | T  | C  | 92.0931153      |
| 45     | rs9266791  | 3.53E-26        | 6          | 0.0151    | 0.0048 | 94595       | C  | T  | 112.021805      |
| 46     | rs9461633  | 7.98E-11        | 6          | 0.0153    | 0.0063 | 94595       | G  | A  | 42.262639       |
| 47     | rs946173   | 2.69E-11        | 1          | -8.00E-04 | 0.0089 | 94595       | G  | A  | 44.3895215      |
| 48     | rs9468344  | 4.00E-13        | 6          | -0.0075   | 0.006  | 94595       | G  | T  | 52.6414626      |
| 49     | rs9852014  | 2.26E-36        | 3          | -0.006    | 0.0105 | 94595       | G  | A  | 158.627555      |



Table S9 The information of SNPs selected for MR analysis between SLE and HDL

| Number | SNPs       | <i>P</i> -value | Chromosome | Beta      | SE     | Sample size | EA | OA | <i>F</i> -value |
|--------|------------|-----------------|------------|-----------|--------|-------------|----|----|-----------------|
| 1      | rs10200680 | 4.96E-09        | 2          | -0.0091   | 0.0093 | 94595       | T  | C  | 34.20392        |
| 2      | rs1078324  | 7.11E-20        | 5          | 0.0049    | 0.016  | 94595       | A  | C  | 83.28446        |
| 3      | rs12662632 | 5.53E-11        | 6          | 0.0169    | 0.014  | 94595       | C  | G  | 42.98038        |
| 4      | rs13019891 | 1.65E-83        | 2          | -2.00E-04 | 0.0049 | 94595       | T  | G  | 374.8476        |
| 5      | rs1464446  | 2.79E-16        | 3          | -0.0018   | 0.0068 | 94595       | T  | G  | 66.94478        |
| 6      | rs154977   | 5.65E-15        | 6          | 0.0163    | 0.0045 | 94595       | G  | C  | 61.01911        |
| 7      | rs17615220 | 2.86E-12        | 6          | -0.0089   | 0.0069 | 94595       | G  | A  | 48.78294        |
| 8      | rs185819   | 2.32E-37        | 6          | 0.0111    | 0.0035 | 94595       | C  | T  | 163.1505        |
| 9      | rs1894406  | 2.22E-20        | 6          | 0.0073    | 0.0036 | 94595       | T  | C  | 85.58207        |
| 10     | rs194675   | 2.71E-12        | 6          | -0.0011   | 0.0052 | 94595       | A  | T  | 48.8908         |
| 11     | rs2022082  | 2.78E-12        | 6          | 0.0043    | 0.0054 | 94595       | C  | T  | 48.83822        |
| 12     | rs2076530  | 2.13E-23        | 6          | 0.0108    | 0.0048 | 94595       | C  | T  | 99.33799        |
| 13     | rs2293765  | 3.61E-19        | 2          | 0.0014    | 0.0049 | 94595       | A  | C  | 80.07252        |
| 14     | rs2293861  | 9.84E-21        | 6          | -0.0021   | 0.0065 | 94595       | T  | C  | 87.19266        |
| 15     | rs2294473  | 3.89E-08        | 6          | 0.0039    | 0.0035 | 94595       | C  | G  | 30.20593        |
| 16     | rs2395004  | 3.98E-08        | 6          | -0.0095   | 0.0048 | 94595       | C  | G  | 30.16009        |
| 17     | rs2431697  | 2.60E-14        | 5          | -0.0024   | 0.0051 | 94595       | C  | T  | 58.01522        |
| 18     | rs2442728  | 4.63E-24        | 6          | -0.0038   | 0.0051 | 94595       | T  | G  | 102.3588        |
| 19     | rs2517554  | 1.43E-10        | 6          | -0.0154   | 0.0053 | 94595       | T  | C  | 41.11707        |
| 20     | rs2573219  | 1.13E-42        | 2          | -0.006    | 0.0082 | 94595       | C  | A  | 187.4711        |
| 21     | rs2853950  | 1.71E-13        | 6          | 0.0016    | 0.005  | 94595       | T  | C  | 54.30977        |
| 22     | rs3095339  | 9.05E-34        | 6          | -0.0084   | 0.0056 | 94595       | G  | A  | 146.7157        |
| 23     | rs3131932  | 3.03E-18        | 6          | -0.001    | 0.0049 | 94595       | A  | G  | 75.86964        |
| 24     | rs353608   | 2.93E-11        | 11         | 0.0012    | 0.0048 | 94595       | G  | A  | 44.22171        |
| 25     | rs3819720  | 2.10E-15        | 6          | -0.008    | 0.0053 | 94595       | A  | G  | 62.96659        |
| 26     | rs389884   | 2.92E-102       | 6          | -0.0245   | 0.0077 | 94595       | G  | A  | 460.9908        |
| 27     | rs4585609  | 1.57E-10        | 6          | 0.0118    | 0.0041 | 94595       | C  | T  | 40.93853        |
| 28     | rs4661543  | 9.40E-11        | 1          | 0.0077    | 0.0083 | 94595       | G  | T  | 41.94263        |
| 29     | rs4728142  | 5.37E-28        | 7          | 0.0026    | 0.0053 | 94595       | A  | G  | 120.3265        |
| 30     | rs4916215  | 5.07E-11        | 1          | -0.0051   | 0.0054 | 94595       | T  | C  | 43.15163        |
| 31     | rs512681   | 8.75E-13        | 2          | -0.006    | 0.0069 | 94595       | A  | C  | 51.10645        |
| 32     | rs572708   | 1.49E-09        | 6          | 0.0108    | 0.0071 | 94595       | C  | T  | 36.54206        |
| 33     | rs6671847  | 6.64E-12        | 1          | -0.0026   | 0.005  | 94595       | A  | G  | 47.13087        |
| 34     | rs6679677  | 4.55E-13        | 1          | 0.0204    | 0.0056 | 94595       | A  | C  | 52.39197        |
| 35     | rs670369   | 6.83E-09        | 6          | -0.0053   | 0.0064 | 94595       | T  | C  | 33.58255        |
| 36     | rs6889239  | 2.19E-18        | 5          | 0.0017    | 0.0055 | 94595       | C  | T  | 76.51123        |
| 37     | rs6903160  | 9.27E-09        | 6          | -0.0028   | 0.005  | 94595       | A  | T  | 32.9883         |
| 38     | rs7097397  | 8.60E-11        | 10         | 0.0037    | 0.0049 | 94595       | A  | G  | 42.11577        |
| 39     | rs721803   | 1.81E-09        | 6          | 0.0048    | 0.0039 | 94595       | A  | G  | 36.16794        |
| 40     | rs7386188  | 1.10E-08        | 8          | -0.0089   | 0.0133 | 94595       | G  | T  | 32.6477         |
| 41     | rs7601754  | 9.31E-25        | 2          | -0.0016   | 0.0063 | 94595       | A  | G  | 105.5375        |
| 42     | rs7746553  | 1.16E-11        | 6          | 0.0049    | 0.0048 | 94595       | G  | C  | 46.04375        |
| 43     | rs7823055  | 1.64E-34        | 8          | -0.0105   | 0.0057 | 94595       | T  | G  | 150.1072        |
| 44     | rs885952   | 8.27E-22        | 6          | -0.0064   | 0.0048 | 94595       | T  | C  | 92.09312        |
| 45     | rs9266791  | 3.53E-26        | 6          | 0.0159    | 0.0044 | 94595       | C  | T  | 112.0218        |
| 46     | rs9461633  | 7.98E-11        | 6          | 0.0069    | 0.0058 | 94595       | G  | A  | 42.26264        |
| 47     | rs946173   | 2.69E-11        | 1          | 0.0063    | 0.0082 | 94595       | G  | A  | 44.38952        |
| 48     | rs9468344  | 4.00E-13        | 6          | -0.0109   | 0.0055 | 94595       | G  | T  | 52.64146        |
| 49     | rs9852014  | 2.26E-36        | 3          | 0.0025    | 0.0096 | 94595       | G  | A  | 158.6276        |
